# Supplementary material
Source: PubMed Central journal article supplement (PMC2701201)
Supplement: NIHMS25611-supplement-01.pdf [file NIHMS25611-supplement-01.pdf]

Supplementary material: following figure is provided as supplementary material

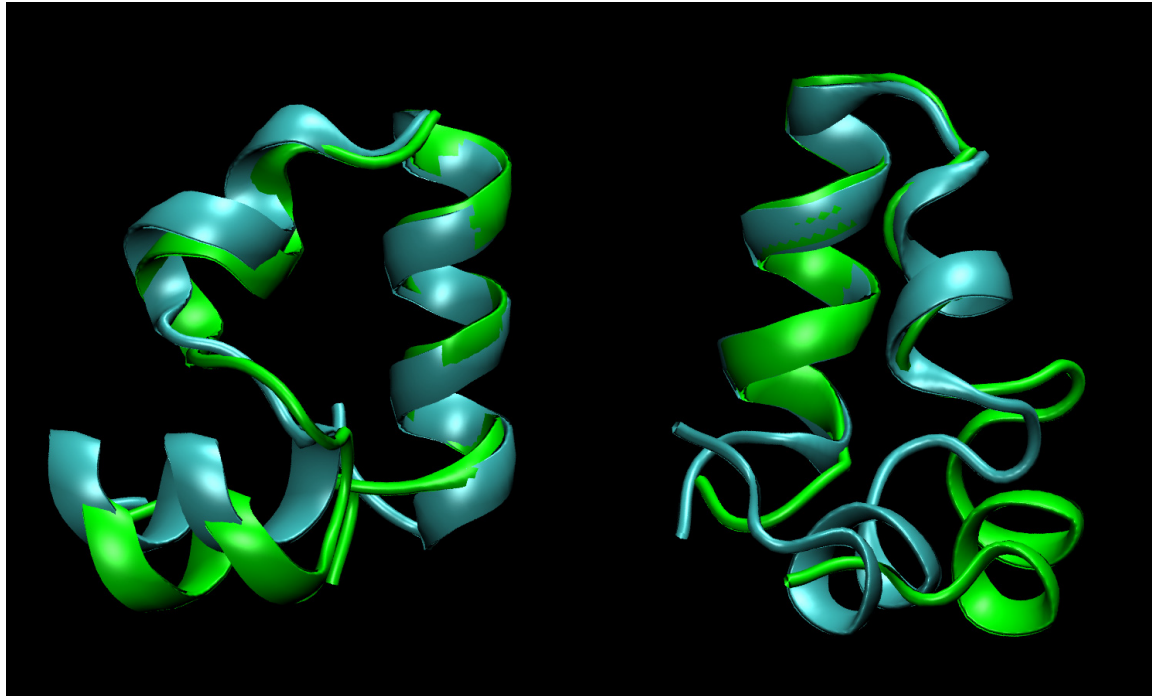

**Figure S1** Fluctuation of helix I in experimental structures. **Left:** superposition of the X-ray structure (cyan, PDB code 1YRF) and average NMR structure (green, PDB code 1VII). **Right:** superposition of two NMR structures (courtesy of C.J. McKnight). For clarity, the structures are in different orientations than in Figure 4.
